# Supplementary material for: Anti-tau conformational scFv MC1 antibody efficiently reduces pathological tau species in adult JNPL3 mice
Source: Springer Nature journal article supplement (doi:10.1186/s40478-018-0585-2), 2018-08-22
Supplement: MOESM1 [file 25666486]

**Anti-tau conformational scFv MC1 antibody efficiently reduces pathological tau species in adult JNPL3 mice**

**Acta Neuropathologica Communications**

Francesca Vitale<sup>1</sup>, Luca Giliberto<sup>1</sup>, Santiago Ruiz<sup>1</sup>, Kristen Steslow<sup>1</sup>, Philippe Marambaud<sup>1</sup>, Cristina d'Abramo<sup>1</sup>.

<sup>1</sup>Litwin-Zucker Center for Research in Alzheimer's disease

The Feinstein Institute for Medical Research

Northwell Health

350 Community Drive, Manhasset

11030 NY, USA

**Corresponding author:** Cristina d'Abramo, PhD

Address: Litwin-Zucker Center for Research in Alzheimer's disease

The Feinstein Institute for Medical Research

350 Community Dr. Manhasset, NY11030

Email: cdabramo@northwell.edu

Tel: +1-516-562-3495

Fax: +1-516-487-3792

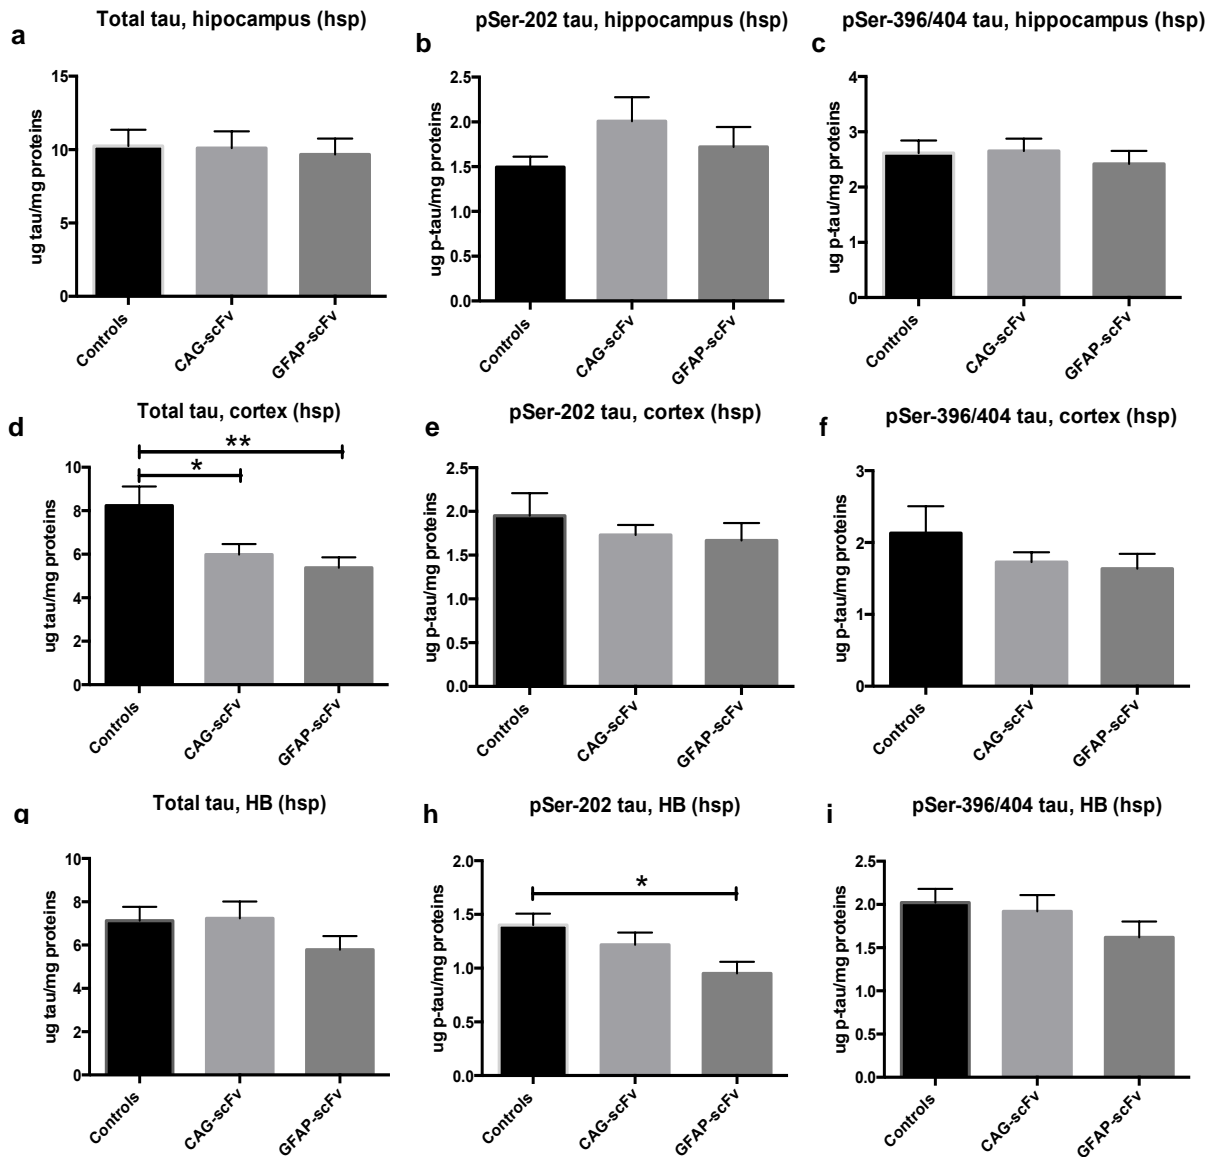

**Fig. S1** Total and phosphorylated soluble tau in hippocampus, cortex and HB. **(a, b, c)** In the hippocampus, total tau was not modulated, as well as the pSer202 and pSer396-404 phospho-epitopes. **(d, e, f)** In the cortex, a significant reduction of total soluble tau was reached with both the CAG (\* $P=0.0325$  by one-way ANOVA) and the GFAP promoter (\*\* $P=0.006$  by one-way ANOVA). **(g, h, i)** In the HB, phosphorylation at Ser202 was significantly decreased in the GFAP-scFMC1 treatment group (\* $P=0.0112$  by one-way ANOVA). Error bars indicate means  $\pm$  SEM

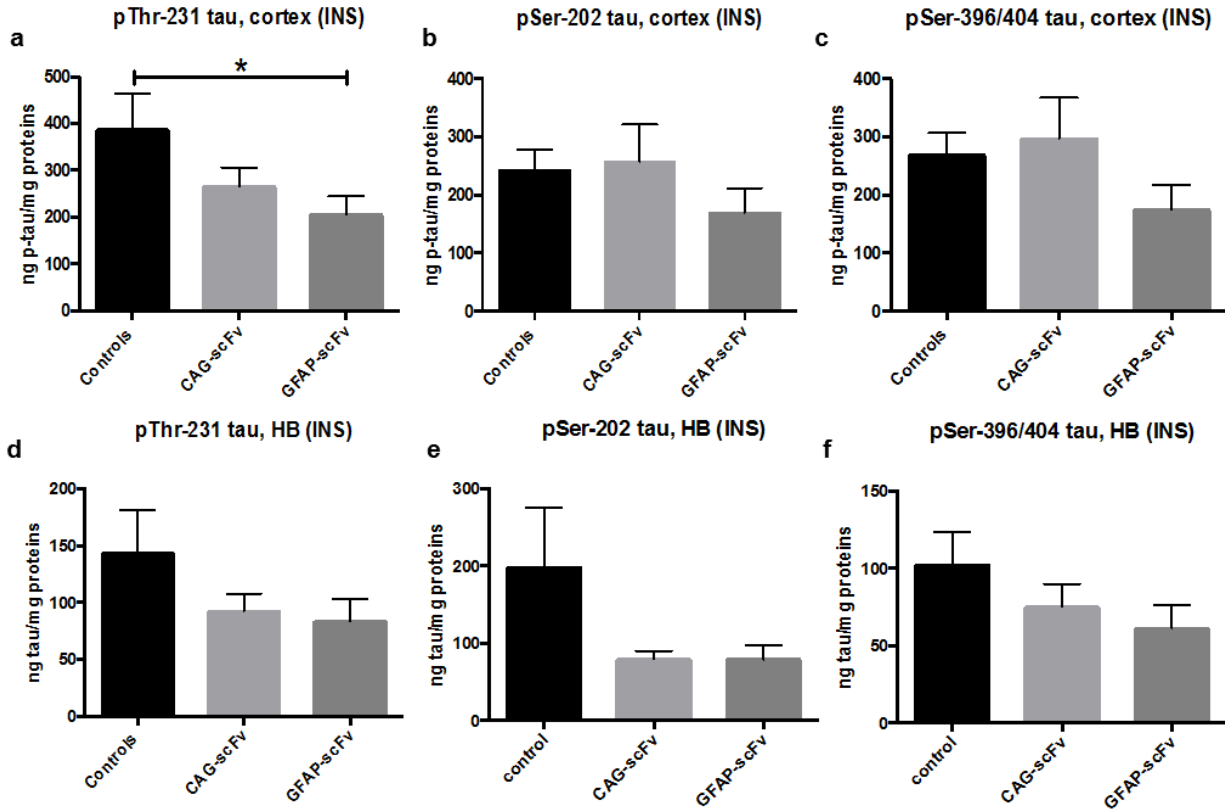

**Fig. S2** Phosphorylated insoluble tau (INS) in cortex and HB. **(a, b, c)** Phosphorylation levels of insoluble tau in the cortex: the pThr231 residues showed a significant reduction (\* $P=0.0398$  by non-parametric Kruskal-Wallis test) in the GFAP expressed group, while pSer202 ( $P=0.0685$ ) and pSer396-404 ( $P=0.0649$ ) showed a non-significant trend towards reduction in the same treatment cohort. **(d, e, f)** In the HB, no significant decrease in phosphorylated insoluble tau was detected, with a trend to reduction on pSer396-404 in the GFAP-scFv treated group ( $P=0.0768$ ). Error bars indicate means  $\pm$  SEM

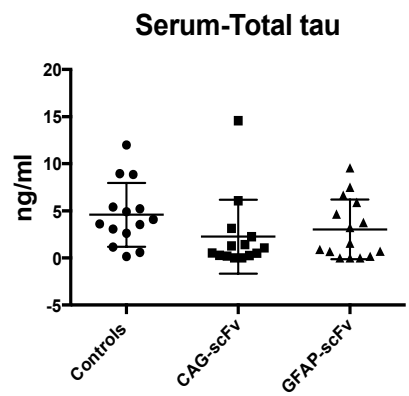

**Fig. S3** Tau levels in serum. At sacrifice, total tau was analyzed in serum (ng/ml), showing no significant difference between groups

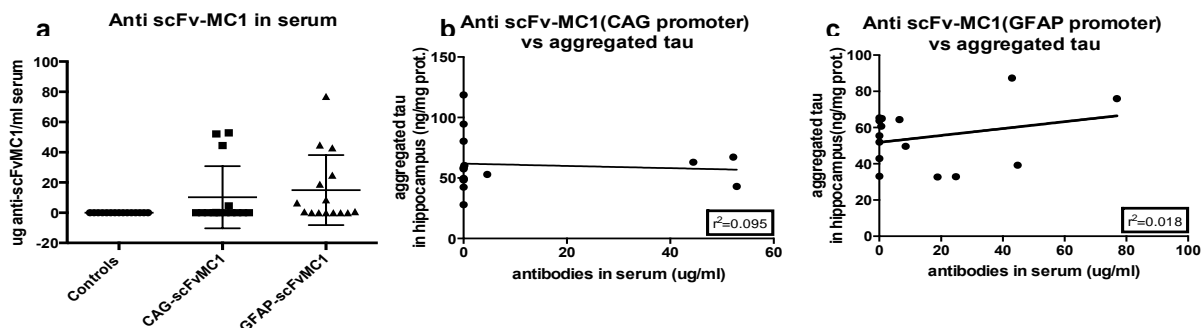

**Fig. S4** Antibodies directed to the scFv-MC1, in serum. **(a)** At sacrifice, few animals in both groups of treatment were positive for the presence of anti-scFv-MC1. **(b)** Linear regression analysis: in the neuronal expression group (CAG promoter) no significant correlation was detected between the concentration of anti-scFvMC1 antibodies in the serum (ug/ml) and the concentrations of the oligomeric/aggregated tau in hippocampus ( $r^2= 0.095$ ). **(c)** In the astrocytic expression group (GFAP promoter) the same analysis was performed, again with no significant correlation between anti-scFvMC1 antibodies and oligomeric/aggregated tau in hippocampus ( $r^2= 0.018$ )
